# Supplementary material for: A Tissue-Based Comparative Effectiveness Analysis of Biomarkers for Early Detection of Colorectal Tumors
Source: PubMed Central journal article supplement — Clin Transl Gastroenterol. 2012 Dec 6;3(12):e27–. doi: 10.1038/ctg.2012.21 (PMC3535074; doi:10.1038/ctg.2012.21), 2012-12-06
Supplement: ctg201221x1.pdf [file ctg201221x1.pdf]

| Colon cancer cell line | AMEL | CSF1PO         | D13S317 | D16S539    | D5S818 | D7S820 | TH01   | TPOX  | vWA       |
|------------------------|------|----------------|---------|------------|--------|--------|--------|-------|-----------|
| COLO 320HSR            | X    | 11             | 11      | 11, 12     | 12     | 9, 12  | 8, 9   | 8,9   | 15, 18    |
| HCT 116                | XY   | 7, 10          | 10, 12  | 11, 13, 14 | 10, 11 | 11, 12 | 8, 9   | 8     | 17, 22    |
| HCT-15                 | XY   | 12             | 8, 11   | 12, 13     | 13     | 10, 20 | 7, 9,3 | 8, 11 | 18, 19    |
| HT-29                  | X    | 11, 12         | 11, 12  | 11, 12     | 11, 12 | 10     | 6,9    | 8,9   | 17, 19    |
| LoVo                   | XY   | 10, 11, 13, 14 | 8, 11   | 9, 12      | 11, 13 | 10, 11 | 9,3    | 8,9   | 17, 18    |
| LS 174T                | X    | 10, 13         | 10, 11  | 11, 12, 13 | 12, 15 | 11     | 6, 7   | 8,9   | 15, 17    |
| LS1034                 | XY   | 11, 12         | 12      | 9, 11      | 12, 13 | 8, 12  | 7      | 9, 11 | 17        |
| RKO                    | X    | 8, 10          | 8, 11   | 13         | 11, 13 | 8, 10  | 6, 10  | 11    | 16, 22    |
| SW48                   | X    | 9, 10          | 11, 12  | 11, 13     | 10, 14 | 9, 10  | 6, 9,3 | 8     | 18, 19,20 |
| SW480                  | X    | 13, 14         | 12      | 13         | 13     | 8      | 8      | 11    | 16        |

**Supplementary Table 1.** Genotypes for the the commercially available colon cancer cell lines.
