# Supplementary material for: A Tissue-Based Comparative Effectiveness Analysis of Biomarkers for Early Detection of Colorectal Tumors
Source: PubMed Central journal article supplement — Clin Transl Gastroenterol. 2012 Dec 6;3(12):e27–. doi: 10.1038/ctg.2012.21 (PMC3535074; doi:10.1038/ctg.2012.21), 2012-12-06
Supplement: ctg201221x2.pdf [file ctg201221x2.pdf]

|              |   | Number of tumors | Gender |        | P-value      | Tumor Phenotype |     |               | BRAF ex 15 |          |               | Tumor location |          |              | Stage |    |     |    |         |
|--------------|---|------------------|--------|--------|--------------|-----------------|-----|---------------|------------|----------|---------------|----------------|----------|--------------|-------|----|-----|----|---------|
|              |   |                  | Male   | Female |              | MSI             | MSS | P-value       | Wild type  | Mutation | P-value       | Distal         | Proximal | P-value      | I     | II | III | IV | P-value |
| <i>ITGA4</i> | M | 152/169          | 77     | 75     | NS           | 42              | 110 | NS            | 124        | 28       | NS            | 89             | 60       | NS           | 25    | 64 | 47  | 16 | NS      |
|              | U | 17/169           | 10     | 7      |              | 3               | 14  |               | 15         | 2        |               | 8              | 9        |              | 2     | 10 | 3   | 2  |         |
| <i>NTRK2</i> | M | 11/169           | 2      | 9      | <b>0.029</b> | 10              | 1   | <b>6.0E-7</b> | 2          | 9        | <b>9.0E-9</b> | 4              | 7        | NS           | 2     | 6  | 2   | 1  | NS      |
|              | U | 158/169          | 85     | 73     |              | 35              | 123 |               | 137        | 21       |               | 93             | 62       |              | 25    | 68 | 48  | 17 |         |
| <i>OSMR</i>  | M | 131/169          | 64     | 67     | NS           | 38              | 93  | NS            | 104        | 27       | NS            | 76             | 52       | NS           | 21    | 58 | 40  | 12 | NS      |
|              | U | 38/169           | 23     | 15     |              | 7               | 31  |               | 35         | 3        |               | 21             | 17       |              | 6     | 16 | 10  | 6  |         |
| <i>SEPT9</i> | M | 138/169          | 70     | 68     | NS           | 40              | 98  | NS            | 113        | 25       | NS            | 77             | 59       | NS           | 24    | 59 | 39  | 16 | NS      |
|              | U | 31/169           | 17     | 14     |              | 5               | 26  |               | 26         | 5        |               | 20             | 10       |              | 3     | 15 | 11  | 2  |         |
| <i>TUBG2</i> | M | 2/169            | 1      | 1      | NS           | 1               | 1   | NS            | 1          | 1        | NS            | 1              | 1        | NS           | 1     | 0  | 1   | 0  | NS      |
|              | U | 167/169          | 86     | 81     |              | 44              | 123 |               | 138        | 29       |               | 96             | 68       |              | 26    | 74 | 49  | 18 |         |
| <i>VIM</i>   | M | 113/169          | 61     | 52     | NS           | 41              | 72  | <b>3.2E-5</b> | 86         | 27       | <b>0.002</b>  | 56             | 55       | <b>0.004</b> | 18    | 46 | 36  | 13 | NS      |
|              | U | 56/169           | 26     | 30     |              | 4               | 52  |               | 53         | 3        |               | 41             | 14       |              | 9     | 28 | 14  | 5  |         |

**Supplementary Table 2.** Fisher's exact and Pearson Chi-square tests were used to analyze the associations between promoter hypermethylation and clinico-pathological data in CRC. Abbreviations: MSI, microsatellite instability; MSS, microsatellite stable; NS, not significant.
